# Supplementary material for: The immunostimulatory activity of polysaccharides from Glycyrrhiza uralensis
Source: PubMed Central journal article supplement (PMC6995267; doi:10.7717/peerj.8294), 2020-01-29

**Fig 6A**

1. P-ERK

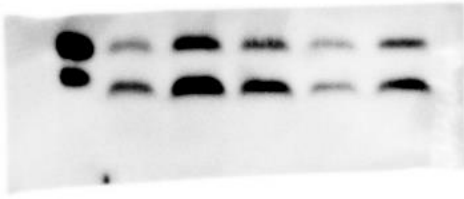

2. ERK

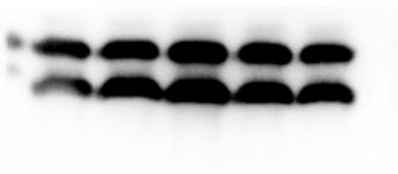

3. P-JNK

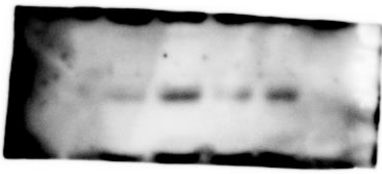

4. JNK

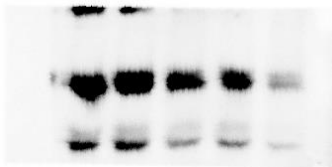

5. p-p38

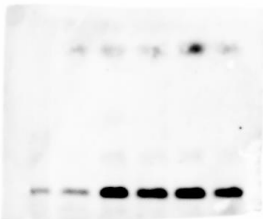

6. p-38

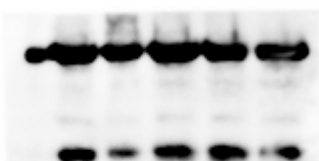

7. p-NF- $\kappa$ Bp65

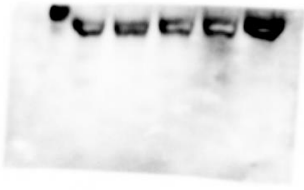

8. NF- $\kappa$ Bp65

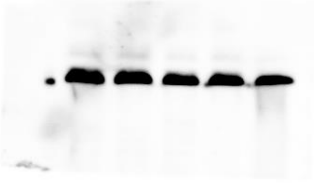

9. P-Ikk $\alpha$ / $\beta$

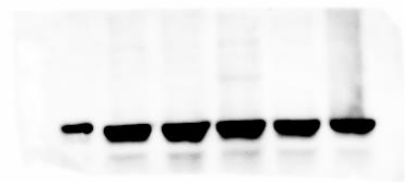

10. Ikk $\beta$

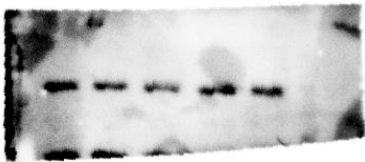

11. Ikk $\alpha$

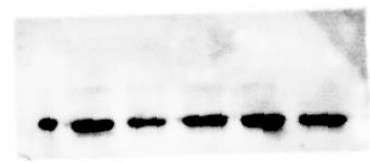

12. p-IkB

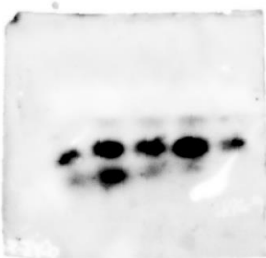

13. I $\kappa$ B

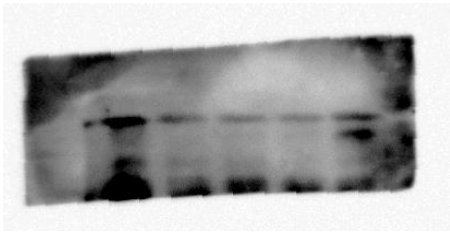

14.  $\beta$ -actin

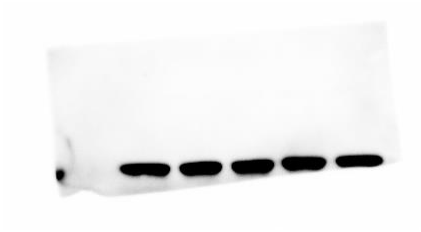

15. NF- $\kappa$ Bp65

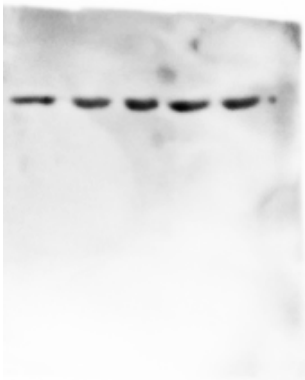

16. Histone

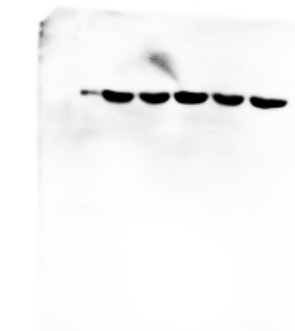

**Fig 6B**

1. p-ERK

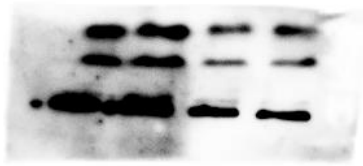

2. ERK

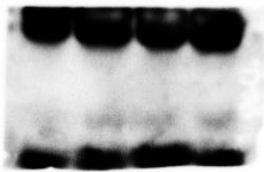

3. p-JNK

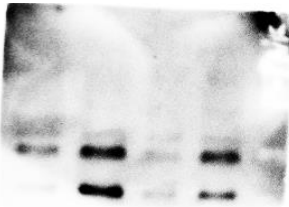

4. JNK

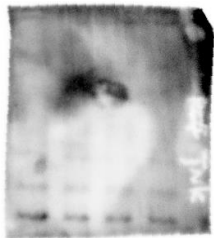

5. p38

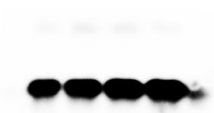

6. p-p38

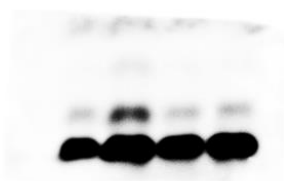

7. p-NK- $\kappa$ Bp65

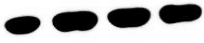

8. NK- $\kappa$ Bp65

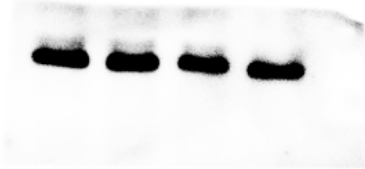

9. p-IKK $\alpha$ / $\beta$

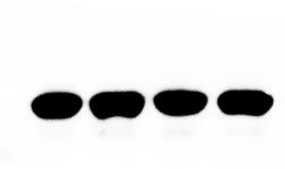

10. IKK $\beta$

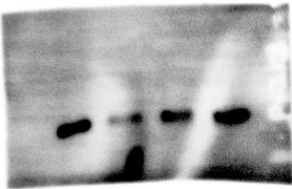

11. IKK $\alpha$

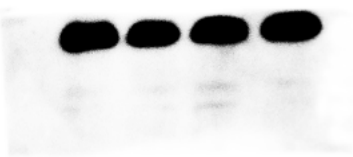

12. p-I $\kappa$ B

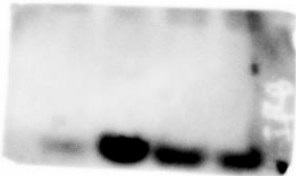

13. I $\kappa$ B

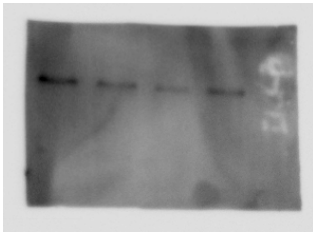

14.  $\beta$ -actin

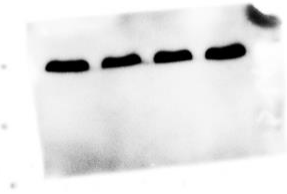

15. NF- $\kappa$ Bp65

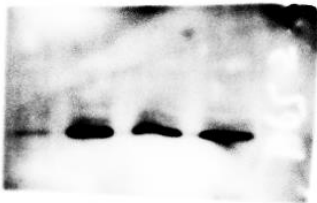

16. Histone

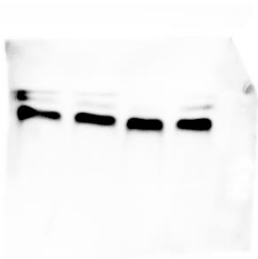

Supplement: peerj-08-8294-s001.pdf [file peerj-08-8294-s001.pdf]
